## Role of *BAG3* protein interactions in cardiomyopathies

Hui-Qi Qu<sup>1</sup>, JuFang Wang<sup>2</sup>, Alexandre Rosa-Campos<sup>3</sup>, Hakon Hakonarson<sup>1,4,5,6,7\*</sup>, Arthur M. Feldman<sup>2</sup>

<sup>1</sup>The Center for Applied Genomics, Children's Hospital of Philadelphia, Philadelphia, Pennsylvania, 19104, USA.

<sup>2</sup>Department of Medicine, Division of Cardiology, the Lewis Katz School of Medicine at Temple University, Philadelphia, Pennsylvania, 19140, USA;

<sup>3</sup>Proteomics Facility, Sanford-Burnham-Presby Medical Discovery Institute, La Jolla, CA, 92037, USA;

<sup>4</sup>Department of Pediatrics, The Perelman School of Medicine, University of Pennsylvania, Philadelphia, Pennsylvania, 19104, USA.

<sup>5</sup>Division of Human Genetics, Children's Hospital of Philadelphia, Philadelphia, Pennsylvania, 19104, USA.

<sup>6</sup>Division of Pulmonary Medicine, Children's Hospital of Philadelphia, Philadelphia, Pennsylvania, 19104, USA.

<sup>7</sup>Faculty of Medicine, University of Iceland, 101 Reykjavik, Iceland

† Corresponding author and reprint requests should be addressed to:

Dr. Hakon Hakonarson

Center for Applied Genomics

3615 Civic Center Blvd

Abramson Building

Philadelphia, PA 19104, United States of America

Telephone: 267-426-0088

Fax: 267-426-0363

Email: [hakonarson@chop.edu](mailto:hakonarson@chop.edu)

## Abstract

**Background:** Bcl-2-associated athanogene 3 (BAG3) plays an important function in cellular protein quality control (PQC) maintaining proteome stability. Mutations in the BAG3 gene result in cardiomyopathies. Due to its roles in cardiomyopathies and the complexity of BAG3-protein interactions, it is important to understand these protein interactions given the importance of the multifunctional cochaperone BAG3 in cardiomyocytes, using an *in vitro* cardiomyocyte model.

**Methods:** The experimental assay was done using high pressure liquid chromatography coupled to tandem mass spectrometry (LC-MS/MS) in the human AC16 cardiomyocyte cell line with the BioID technology.

**Results:** Proteins with BAG3-interaction were identified in all the 28 hallmark gene sets enriched in idiopathic cardiomyopathies and/or ischemic disease. Among the 24 hallmark gene sets enriched in both idiopathic cardiomyopathies and ischemic disease, 15 gene sets had at least 3 proteins with BAG3-interaction.

**Conclusions:** This study highlights BAG3 protein interactions, unveiling the key gene sets affected in cardiomyopathies, which help to explain the molecular mechanisms of the cardioprotective effects of BAG3. In addition, this study also highlighted the complexity of proteins with BAG3 interactions, implying unwanted effects of BAG3.

**Keywords:** apoptosis; BAG3; bioID; cardiomyopathy; *in vitro*

## Introduction

BAG cochaperone 3 (BAG3), also known as Bcl-2-associated athanogene 3, is a multi-functional protein, which is expressed ubiquitously in animals and homologs have been reported in plants<sup>1</sup>. BAG3 was first recognized for its ability to bind to Bcl2 with subsequent inhibition of apoptosis while other studies have found that it supports a diverse array of cellular functions including autophagy<sup>2</sup>, excitation-contraction coupling, mitochondrial function<sup>3</sup>, and the integrity of the sarcomere<sup>4</sup>. BAG3 has been recognized as playing a critical role in cellular protein quality control (PQC) to maintain the health of the proteome<sup>5</sup>. Mutations in the *BAG3* gene result in both dilated cardiomyopathy (DCM)<sup>6</sup> and peripartum cardiomyopathy (PPCM)<sup>7</sup> in a dominant inheritance model. Critical roles of *BAG3* in cardiomyocytes involves the maintenance of mitochondrial homeostasis that is mediated by both heat shock protein 70 (Hsp70)<sup>8</sup> and the small heat shock proteins HspB6 and HspB8 (ref). BAG3 also has anti-apoptosis activity by binding Bcl-2<sup>9</sup>. BAG3 has 4 protein binding domains, including (1) 1 WW (Trp-Trp) domain, binding with proteins in signal transduction processes<sup>10</sup>, e.g. the PDZ domain containing guanine nucleotide exchange factor 2 (PDZGEF2) to promote cell adhesion<sup>11</sup>; (2) 2 IPV (Ile-Pro-Val) motifs, binding with small heat shock proteins (sHsps) HspB6/HspB8<sup>12</sup>; (3) 1 proline-rich repeat (PXXP) region, binding with SH3 (Src homology 3) motifs, e.g., in phospholipase C- $\gamma$  (PLC- $\gamma$ ) that also serves as an attachment site for the dineen motor transport of misfolded proteins to the peri-nuclear aggresomes<sup>13,14</sup>; and (4) 1 BAG domain, binding with Hsp70 and Bcl-2<sup>12-14</sup>.

While it is true that BAG3 is recognized for its multifunctionality and its role has been extensively studied, there is still much to uncover about its complex interactions and functions, especially in the context of different diseases. For instance, while the association of BAG3 with both cardiomyopathy and Parkinson's disease (PD) has been reported, the genetic associations are in the opposite directions, i.e., the risk allele in DCM is protective against PD. The DCM-associated SNP rs2234962<sup>15,16</sup> is in tight linkage disequilibrium with the PD-associated SNP rs72840788 ( $r^2 = 1$  in European populations)<sup>17,18</sup>. We advocate for a greater focus on the intricate BAG3 interaction network, as a reductionist approach may fail to capture the subtleties and multifaceted nature of BAG3's role. Due to the complexity of BAG3-protein interactions, it is useful to gain a better understanding of the specific proteins with which BAG3 participates in its activity as a multifunctional cochaperone by using an *in vitro* cell model to better understand BAG3 binding with other cellular proteins. For this purpose, we performed a proteomics study using the BioID proximity-dependent biotinylation method to identify proteins that interact with BAG3, particularly those from the gene sets with expression levels correlated with cardiomyopathies. BioID is a unique technology to screen for protein interactions in living cells<sup>19</sup>. In addition to direct protein interactions, BioID is able to identify weak or transient interactions, as well as proteins in close proximity. This discovery experiment was carried out to identify potentially novel proteins that bind to or interact with BAG3.

## Research Design and Methods

**Gene expression data:** Gene expression data in tissue samples from left ventricular myocardium in two disease conditions, idiopathic and ischemic cardiomyopathies, were made available by

Hannenhalli et al<sup>20</sup>. The study included 16 controls, 86 idiopathic, and 108 ischemic cardiomyopathies. The heart tissue was snap-frozen at time of cardiac transplantation. The gene expression assay was based on data generated using the Affymetrix Human Genome U133A Array. The data analysis was done by the GEO2R (<https://www.ncbi.nlm.nih.gov/geo/info/geo2r.html>). P values were adjusted by the Benjamini and Hochberg false discovery rate method. The data are publicly available at the NCBI Gene Expression Omnibus (GEO) database (<https://www.ncbi.nlm.nih.gov/geo/query/acc.cgi?acc=GSE5406>).

Gene Set Enrichment Analysis (GSEA) was done by the GSEA v4.3.2 software (Broad Institute of MIT and Harvard, MA) based on the Molecular Signatures Database (MSigDB)<sup>21</sup> hallmark gene set collection<sup>22</sup>. FDR corrected p-values <0.05 were considered statistically significant.

**Cell experimental assay:** The cell model used in this study was human AC16 cardiomyocyte cell line derived from adult human ventricular heart tissues (SCC109, Sigma-Aldrich). The cells were treated and analyzed based on five different conditions: (1) BAG3\_Biotin: Cells transfected by plasmid expressing BioID-BAG3 for 48 hours, then get Biotin treatment for 16 hours; (2) BioID: Cells transfected by plasmid expressing BioID vector only for 48 hours, then get Biotin treatment for 16 hours; (3) BAG3 (to correct protein over-expression by BAG3): Cells transfected by plasmid expressing BioID-BAG3, without followed Biotin treatment; (4) AC16\_Biotin (to correct protein-Biotin interaction): Cells get Biotin treatment for 16 hours; (5) AC16: Cells only. Three replicates were performed simultaneously for each treatment condition. Details of *BAG3* construct delivered using adeno-associated virus (AAV) vector has been described in our previous study<sup>23</sup>. The BioID experimental assay was done using high pressure liquid chromatography coupled to tandem mass spectrometry (LC-MS/MS) previously described through a collaboration with the Proteomics Facility, Sanford-Burnham-Presby Medical Discovery Institute, La Jolla, CA<sup>24</sup>.

**Data analysis of BAG3-Protein interactions:** The BioID data were analyzed using MSstats package from R Bioconductor<sup>25</sup>. By comparing the groups of BAG3\_Biotin vs. BioID, all proteins with adjusted P-value<0.05 by the Benjamini and Hochberg false discovery rate method were identified. The effect sizes of BAG3-protein interactions were corrected by  $[\log_2\text{FC}(\text{BAG3\_Biotin vs BioID}) - [\log_2\text{FC}(\text{AC16\_Biotin vs AC16}) - [\log_2\text{FC}(\text{BAG3 vs BioID})]]$ , i.e. BAG3-protein interactions being corrected for biotin-protein interactions and BAG3-increased protein levels.

## Results

### Gene expression in idiopathic and ischemic cardiomyopathies

Among the 50 hallmark gene sets, 26 showed significance in idiopathic CM, and 26 showed significances in ischemic CM (Table 1, Fig.1). From these gene sets, 24 gene sets were significant in both idiopathic and ischemic CMs, while the other 4 gene sets had significances in only idiopathic or ischemic CMs. For the later 4 gene sets, the same direction trend of

enrichment was observed in the other type of CM. In particular, *BAG3* levels were decreased in both idiopathic (fold change=0.646, adjusted P-value=9.60E-06) and ischemic (fold change =0.633, adjusted P-value=9.77E-06) cardiomyopathies.

### **BAG3-Protein interactions**

387 proteins were identified with significant adjusted P-values and positive BAG3-protein interactions (Supplementary Table 1). Proteins with BAG3-interaction were identified in each of 28 hallmark gene sets enriched in the idiopathic and/or ischemic cardiomyopathies. Among the 24 hallmark gene sets enriched in both idiopathic and ischemic cardiomyopathies, 15 gene sets had at least 3 proteins with BAG3-interaction (Table 2, Fig.1).

### **Discussion**

This study identified 387 proteins with direct or indirect BAG3 interactions. Among these proteins, heat shock 70 kDa protein 6 (HSPA6)<sup>26</sup> and Hsp70-binding protein 1 (HSPBP1)<sup>27</sup> encode a Hsp70 protein and regulate Hsp70 function, respectively. Bcl-2-associated transcription factor 1 (BCLAF1) activates the p53 pathway and induces apoptosis<sup>28</sup>, and may contribute to myocardial reperfusion injury<sup>29</sup>. BCL2/adenovirus E1B 19 kDa protein-interacting protein 3-like (BNIP3L) activates the ER and mitochondrial cell death pathways, and induces cardiomyopathy<sup>30</sup>. In addition, we observed 15 gene sets with at least 3 BAG3-interacted proteins further supporting the important role of BAG3 in the biology of the heart (Table 2). In a previous study, Chen et al. identified 382 BAG3-interacting proteins in cancer cell lines using stable isotope labeling with amino acids in cell culture (SILAC) combined with mass spectrometry (MS)<sup>31</sup>. Of the 387 proteins identified in our study, 22 overlapped with those reported by Chen et al. Given the estimated 20,000 protein-coding genes in the human genome, this overlap is highly statistically significant and unlikely to occur by chance alone (P=3.69E-07). Furthermore, many of the 360 proteins identified by Chen et al. but not replicated in our study are closely associated with cancer-related processes, including glutathione metabolism, disruptions in protein catabolism, protein folding, ubiquitin-dependent degradation, apoptosis evasion, post-translational modifications, and the regulation of protein complex assembly. Notably, 365 of the proteins identified in our study have not been reported by Chen et al.

#### **1. Proteins with roles in cell cycle**

Cardiomyocytes are taken as terminally differentiated and don't proliferate after birth<sup>32</sup>. In a recent study, a proliferative burst in preadolescent mice was observed<sup>33</sup>. However, further experimental validation is needed, as this finding has not yet been replicated by other researchers. If the same phenomenon is true in human, the highlighted cell cycle proteins in this study may imply for early intervention for cardiomyopathies, particularly for a BAG3-based therapy. Adult cardiomyocytes also exhibit a dynamic range of cell cycle activity under various physiological and pathological conditions, e.g. in pathologic myocardial hypertrophy<sup>34</sup>.

BAG3-interaction was identified in 31 gene proteins from four important gene sets in cell cycle, including MYC\_TARGETS\_V1, E2F\_TARGETS, G2M\_CHECKPOINT, and

P53\_PATHWAY. These four gene sets were down-regulated in both idiopathic and ischemic cardiomyopathies. MYC, E2F and p53 are important regulators of cell-cycle progression<sup>35</sup>. We observed BAG3 interaction of 13 proteins involving MYC signaling, including target variant 1 proteins, 11 proteins in E2F signaling molecules, 9 proteins in cell cycle G2/M checkpoint, and 3 proteins in the p53 pathway. The MYC\_TARGETS\_V1 genes are regulated by MYC<sup>22</sup>, and involved in cell-cycle progression and cell proliferation<sup>36</sup>. c-Myc plays an essential role in signaling DNA damage-induced apoptosis through the control of the p53 tumor suppressor protein<sup>37</sup>. Activation of p53 pathway promotes cell cycle arrest to allow DNA repair or apoptosis for cells with serious DNA damage<sup>38</sup>. The G2/M checkpoints prevent DNA damaged cells from entering mitosis<sup>39</sup>. Acting through the E2F targets, E2F integrates cell cycle progression with DNA repair, replication, and G2/M checkpoints<sup>34</sup>.

The proteins with BAG3-interaction in these gene sets also harbor opportunities for small molecular therapies. Deficiency of the MYC target gene phosphoglycerate kinase 1 (*PGK1*) from genetic mutations may cause myopathy<sup>40</sup>. The protein encoded by *PGK1* catalyzes the production of adenosine 5'-triphosphate (ATP) and its activity is regulated by ATP<sup>41</sup>. Biallelic deficiency of the MYC target gene complement component 1 Q subcomponent-binding protein, mitochondrial (*CIQBP*) cause mitochondrial respiratory-chain deficiencies and severe cardiomyopathy<sup>42</sup>. Copper supplementation has been shown to up-regulate the function of the *CIQBP* protein and may improve cardiac function<sup>43</sup>.

## 2. Interactions with proteins involved in apoptosis and cell damage responses

In addition to the cell cycle proteins, BAG3 interacts with proteins in a number of gene sets downregulated in cardiomyopathies, including HALLMARK\_APOPTOSIS, HALLMARK\_HYPOXIA, HALLMARK\_UV\_RESPONSE\_UP, HALLMARK\_XENOBIOTIC\_METABOLISM, HALLMARK\_UNFOLDED\_PROTEIN\_RESPONSE, HALLMARK\_PROTEIN\_SECRETION, HALLMARK\_COMPLEMENT, HALLMARK\_TNFA\_SIGNALING\_VIA\_NFKB, HALLMARK\_MTORC1\_SIGNALING, HALLMARK\_ESTROGEN\_RESPONSE\_LATE, HALLMARK\_PI3K\_AKT\_MTOR\_SIGNALING, and HALLMARK\_IL2\_STAT5\_SIGNALING. BAG3 interactions with apoptosis process, responses to DNA damage and oxidative stress, and cell repairs were highlighted.

It has been suggested that cardiomyocyte apoptosis may contribute to myocardial reperfusion injury<sup>44,45</sup> and cardiomyopathies<sup>46,47</sup>. Currently, there is controversial evidence regarding the involvement of apoptosis in cardiomyopathies. Narula et al.<sup>48</sup> described an interruption in the apoptosis cascade, including nuclear fragmentation and condensation in cardiomyocytes, terming it 'apoptosis-interruptus.' Conversely, our studies and others suggest that apoptosis plays a critical role in heart failure<sup>49</sup>.

The gene expression data of cardiomyopathies show that the apoptosis pathway is down-regulated in both idiopathic and ischemic cardiomyopathies. Cardiomyocytes with interrupted apoptosis may undergo necrosis. BAG3 binds to the Bcl-2 Homology 4 (BH4) domain of Bcl-2 to inhibit mitochondrial-dependent (intrinsic) apoptosis<sup>9</sup>, thus protect from cell death. Nine

proteins in the APOPTOSIS gene set were identified of BAG3 interaction in this study, including 3 caspases, including CASP1, CASP3, and CASP4.

Hypoxia significantly alters myocardial gene expression, mediated by hypoxia inducible factor 1 subunit alpha (HIF1A)<sup>50</sup>. Hypoxia has been shown to induce dilated cardiomyopathy in chick embryos<sup>51</sup>. Overexpression of BAG3 has been shown to attenuate hypoxia-induced cardiomyocyte apoptosis<sup>52</sup>. DNA damage induces apoptosis and cardiomyopathy<sup>53</sup>, whereas HALLMARK\_UV\_RESPONSE\_UP genes (i.e., up-regulated genes in response to UV), play major roles in DNA damage repair<sup>54</sup>. Moreover, Xenobiotic toxicity causes cardiomyopathy through oxidative stress<sup>55</sup> resulting in dysregulated gene expression.

The unfolded protein response (UPR) decreases global protein synthesis, increases endoplasmic reticulum (ER)-associated degradation of misfolded proteins, and activates protein-folding in ER<sup>56</sup>. BAG3 serves as a cochaperone with Hsp70 and is involved in a wide range of protein folding processes, including refolding of misfolded<sup>57</sup>. The protein secretion pathway acts on protein folding, post-translational modifications (PTMs), and protein trafficking<sup>58</sup>, and is important in cardiac repair<sup>59</sup>.

TNF- $\alpha$ <sup>60</sup> and complement activation<sup>61</sup> have been suggested as contributing factors to myocardial reperfusion injury and cardiomyopathy. However, complement activation contributes to tissue repair<sup>62</sup>. The genes encoding components of the complement system are downregulated in idiopathic and ischemic cardiomyopathies, which is consistent with the recognition that long-term effects of complement inhibitors may be detrimental<sup>63</sup>. While NF- $\kappa$ B signaling may be cardioprotective in hypoxic or ischemic myocardial injury<sup>64</sup>, it has also been shown to mediate chronic inflammation<sup>65</sup>. The mTORC1 signaling regulates cell growth and metabolism<sup>66</sup> and mediates adaptive cardiac hypertrophy<sup>67</sup>. Its inhibition increases overall protein degradation by the ubiquitin proteasome system<sup>68</sup>, and may attenuate cardiac remodeling and heart failure<sup>67</sup>. Late estrogen response pathway may prevent apoptosis and necrosis of cardiac and endothelial cells<sup>69</sup>. Genes up-regulated by activation of the PI3K/AKT/mTOR pathway, include a major intracellular network that leads to cell proliferation<sup>70</sup> and inhibits cardiomyocyte apoptosis<sup>71</sup>. IL2\_JAK\_STAT5\_SIGNALING genes are up-regulated by STAT5 in response to IL2 stimulation and modulate CD4+ Th cell differentiation<sup>72</sup>, and upregulate the expression of c-Myc, BCL-2, and BCL-x further exacerbating the inflammatory response<sup>73</sup>.

### 3. Interactions with proteins upregulated in cardiomyopathies

In contrast to the above gene sets, the HALLMARK\_INTERFERON\_ALPHA\_RESPONSE and HALLMARK\_OXIDATIVE\_PHOSPHORYLATION gene sets are both up-regulated in cardiomyopathies. Interferon inhibits cardiac cell function *in vitro*<sup>74</sup> and interferon treatment has been shown to produce cardiotoxicity<sup>75</sup>. The heart is in high demand of energy by oxidative phosphorylation, where defective oxidative phosphorylation may cause cardiomyopathy<sup>76</sup>. Oxidative phosphorylation genes are upregulated in cardiomyopathies, which may cause overproduction of reactive oxygen species (ROS)<sup>77</sup>. BAG3 interactions with these upregulated genes in cardiomyopathies is interesting as this could ameliorate the cardioprotective effects of BAG3. Adjunct therapy targeting these proteins may thus improve the therapeutic effects of BAG3. The

NADH dehydrogenases, i.e., NDUFB3 (NADH dehydrogenase 1 beta subcomplex subunit 3), NDUFB6 (NADH dehydrogenase 1 beta subcomplex subunit 6), and NDUFV1 (NADH dehydrogenase flavoprotein 1, mitochondrial), can be inhibited by metformin. The potential heart protective effects by metformin are gaining more research attention<sup>78</sup>.

## Conclusion

This study utilized the relatively new technique of BioID to identify interactions between BAG3 and various gene sets. The goal was to uncover unique proteins and protein pathways that might contribute to disease when BAG3 levels are under-expressed. Such under-expression can occur due to loss-of-function mutations caused by truncations, deletions, or unique mutations secondary to single nucleotide variants. These variants may change an amino acid, insert an amino acid, or alter the reading frame, resulting in truncation. Not unexpectedly, we identified a plethora of associated proteins. In view of the small size of BAG3, the limited number of binding sites, and the somewhat focused activities of the protein, the number of intersecting proteins identified by this new technique represents an overabundance of detected proteins. However, the fact that many of the observed proteins have been associated with BAG3 in various animal studies raises the larger question of how a single protein might interact with a large number of target proteins. The fact that virtually every known protein interaction with BAG3 has been detected by the BioID assay suggests that enhancing the assay's sensitivity might allow for a more nuanced approach to this question. Additionally, new means of discriminating interactome data, which remain proprietary, could be useful.

In conclusion, this study highlights the observed interactions of BAG3 with key gene sets that are affected in cardiomyopathies, thereby unveiling some of the molecular mechanisms involved with the cardioprotective effects of BAG3. In addition, this study also highlights the complexity of proteins with BAG3 interactions, implying unwanted effects of BAG3. Adjunct therapy to address unwanted effects of BAG3 may be indicated, such as the use of metformin to inhibit the consequences of NADH dehydrogenase activation. A limitation of this study is the AC16 cell model, which is an immortalized cell line with passages over numerous generations<sup>79</sup>, and may not represent the actual cardiomyocytes in human heart. Although AC16 cells are derived from human ventricles, they exhibit several key limitations: 1) they do not exhibit contractile activity, 2) they are highly proliferative, and 3) the sarcomere is not organized in AC16 cells. While AC16 cells differ from primary cardiomyocytes in these aspects, they remain a widely used *in vitro* model for studying human cardiomyocyte-related processes due to their human origin and ability to express cardiac-specific markers. The primary objective of our study was to investigate the complex BAG3 interaction network and identify its interacting proteins, so the aforementioned limitations do not significantly impact our findings. Further study using different cell models, in particular specialized cardiomyocyte models, will help to verify the BAG3 interactions, and enable investigations of the more focused phenotypic effects. Additionally, validation through co-immunoprecipitation (Co-IP) studies, although challenging to scale up and expensive for large-scale applications, will be important for confirming selected candidate proteins of interest in human heart tissues and human-induced pluripotent stem cell-



derived cardiomyocytes (hiPSC-CMs) to corroborate our findings and enhance their relevance to the human heart.

## Figure legend

**Figure 1.** Venn plot of Hallmark gene sets enriched in cardiomyopathies and those with BAG3 interactions

**Supplementary Materials:** Table S1: 387 proteins with BAG3-protein interactions.

**Author Contributions:** Conceptualization, H.H. and A.M.F.; methodology, H.Q.Q.; formal analysis, H.Q.Q.; investigation, H.Q.Q., J.W., and A.R.C.; resources, A.M.F.; data curation, H.Q.Q. and A.R.C.; writing—original draft preparation, H.Q.Q.; writing—review and editing, H.H. and A.M.F.; visualization, H.Q.Q.; supervision, H.H.; project administration, H.H. and A.M.F.; funding acquisition, H.H. and A.M.F. All authors have read and agreed to the published version of the manuscript.” Please turn to the CRediT taxonomy for the term explanation. Authorship must be limited to those who have contributed substantially to the work reported.

**Funding:** The study was supported by Institutional Development Funds from the Children’s Hospital of Philadelphia to the Center for Applied Genomics, the Neff Family Foundation, the Children’s Hospital of Philadelphia Endowed Chair in Genomic Research (to HH), and funding from Renovacor, Inc (to AMF).

**Institutional Review Board Statement:** This study was approved by the Institutional Review Board (IRB) of the Children’s Hospital of Philadelphia. Human participants and personal information are inaccessible to the research group. All human subjects or their legal guardians provided written informed consent.

**Informed Consent Statement:** Not applicable.

**Data Availability Statement:** Supporting data from this study can be obtained by emailing the corresponding author Dr. Hakon Hakonarson.

**Conflicts of Interest:** The authors declare no potential conflicts of interest with respect to the research, authorship, and/or publication of this article.

**Table 1 50 hallmark gene sets in idiopathic and ischemic cardiomyopathies**

| HALLMARK                          | SIZE | Idiopathic | NES   | FDR q-val | ischemic | NES   | FDR q-val | Proteins                                                     |
|-----------------------------------|------|------------|-------|-----------|----------|-------|-----------|--------------------------------------------------------------|
| ADIPOGENESIS                      | 176  | case       | 1.11  | 0.420844  | controls | -1.20 | 0.169207  | DBT,TST,MDH2                                                 |
| ALLOGRAFT_REJECTION               | 197  | controls   | -1.05 | 0.394748  | case     | 1.07  | 0.487176  | RPS9,MAP3K7                                                  |
| ANDROGEN_RESPONSE                 | 98   | controls   | -1.83 | 0.001006  | controls | -1.90 | 5.31E-04  | SRP19,SGK1                                                   |
| ANGIOGENESIS                      | 35   | case       | 1.21  | 0.27238   | case     | 1.24  | 0.252174  |                                                              |
| APICAL_JUNCTION                   | 178  | controls   | -1.07 | 0.375625  | controls | -1.02 | 0.461531  | LIMA1,GTF2F1,EPB41L2,TSC1                                    |
| APOPTOSIS                         | 157  | controls   | -1.51 | 0.018923  | controls | -1.40 | 0.044813  | LMNA,ANXA1,CASP1,CASP4,CASP3,PPT1,BID,BNIP3L,SPTAN1          |
| BILE_ACID_METABOLISM              | 99   | case       | 1.74  | 0.009496  | case     | 1.62  | 0.01886   | PRDX5,ATXN1                                                  |
| CHOLESTEROL_HOMEOSTASIS           | 61   | controls   | -1.32 | 0.074947  | controls | -1.28 | 0.104645  | ANXA5                                                        |
| COAGULATION                       | 134  | case       | 1.42  | 0.075674  | case     | 1.59  | 0.018179  | ANXA1,CSRP1                                                  |
| COMPLEMENT                        | 186  | controls   | -1.44 | 0.028868  | controls | -1.33 | 0.0762    | CASP1,CASP4,CASP3,ANXA5,PRSS3,CSRP1                          |
| DNA_REPAIR                        | 135  | controls   | -0.93 | 0.655048  | controls | -1.01 | 0.458158  | REV3L,EDF1,CETN2,NME3,GTF2F1,RFC2,RFC3,HPRT1,TP53            |
| E2F_TARGETS                       | 187  | controls   | -1.57 | 0.012377  | controls | -1.50 | 0.026689  | RFC2,RFC3,PSIP1,CBX5,NUP153,PNN,TMPO,STMN1,NASP,RACGAP1,TP53 |
| EPITHELIAL_MESENCHYMAL_TRANSITION | 192  | case       | 1.53  | 0.031229  | case     | 1.82  | 0.005753  | TAGLN                                                        |
| ESTROGEN_RESPONSE_EARLY           | 198  | controls   | -1.58 | 0.012051  | controls | -1.64 | 0.006863  | DHRS2,SVIL                                                   |
| ESTROGEN_RESPONSE_LATE            | 199  | controls   | -1.49 | 0.019649  | controls | -1.49 | 0.025326  | TST,HPRT1,DHRS2,SGK1                                         |

|                           |     |          |       |          |          |       |          |                                                                                        |
|---------------------------|-----|----------|-------|----------|----------|-------|----------|----------------------------------------------------------------------------------------|
| FATTY_ACID_METABOLISM     | 145 | case     | 1.09  | 0.438963 | controls | -1.15 | 0.224652 | MDH2,ACADVL,UROD,MIF                                                                   |
| G2M_CHECKPOINT            | 195 | controls | -1.52 | 0.017902 | controls | -1.48 | 0.027784 | NCL,SFPQ,TMPO,STMN1,NASP, TOP1,KIF23,TPX2,RACGAP1                                      |
| GLYCOLYSIS                | 186 | case     | 1.02  | 0.49266  | case     | 1.16  | 0.35265  | MDH2,STMN1,NASP,MIF,PGK1, PC                                                           |
| HEME_METABOLISM           | 194 | case     | 1.02  | 0.524825 | case     | 0.98  | 0.637137 | UROD, TOP1, CAST, YPEL5, HEBP 1, BNIP3L, HDGF, PC, ASNS                                |
| HYPOXIA                   | 192 | controls | -1.77 | 0.002004 | controls | -1.56 | 0.013079 | NAGK, BNIP3L, PRDX5, MIF, PGK 1, FOSL2, KLF6                                           |
| IL2_STAT5_SIGNALING       | 177 | controls | -1.50 | 0.019949 | controls | -1.45 | 0.030848 | CASP3, KLF6, PHLDA1                                                                    |
| IL6_JAK_STAT3_SIGNALING   | 86  | controls | -1.84 | 8.15E-04 | controls | -1.62 | 0.00786  | IRF9                                                                                   |
| INFLAMMATORY_RESPONSE     | 194 | controls | -1.83 | 0.001168 | controls | -1.69 | 0.004573 | KLF6                                                                                   |
| INTERFERON_ALPHA_RESPONSE | 80  | case     | 1.73  | 0.007606 | case     | 1.78  | 0.004291 | CASP1, IRF9, TRIM21, IFI44, SP110, IFIH1                                               |
| INTERFERON_GAMMA_RESPONSE | 177 | case     | 1.27  | 0.201025 | case     | 1.41  | 0.070512 | CASP1, CASP4, CASP3, IRF9, TRIM 21, IFI44, SP110, IFIH1                                |
| KRAS_SIGNALING_DN         | 195 | case     | 0.86  | 0.829231 | case     | 0.87  | 0.871536 | KMT2D, SGK1                                                                            |
| KRAS_SIGNALING_UP         | 196 | controls | -1.06 | 0.38636  | case     | 1.01  | 0.630874 | WDR33                                                                                  |
| MITOTIC_SPINDLE           | 181 | controls | -1.21 | 0.160671 | controls | -1.25 | 0.127236 | PCNT, CAPZB, PCM1, RANBP9, C D2AP, EPB41L2, TSC1, SPTAN1, KIF23, TPX2, RACGAP1, APC    |
| MTORC1_SIGNALING          | 193 | controls | -2.35 | 0        | controls | -2.31 | 0        | HPRT1, PGK1, PSMC2, ATP6V1D, ASNS                                                      |
| MYC_TARGETS_V1            | 189 | controls | -2.18 | 0        | controls | -2.27 | 0        | HPRT1, PGK1, HNRNPC, EEF1B2, GLO1, C1QBP, PWP1, SF3A1, SERBP1, MRPL9, HDGF, CBX3, PHB2 |
| MYC_TARGETS_V2            | 55  | controls | -2.16 | 0        | controls | -2.13 | 0        | CBX3, TCOF1                                                                            |

|                                 |     |          |       |          |          |       |          |                                                         |
|---------------------------------|-----|----------|-------|----------|----------|-------|----------|---------------------------------------------------------|
| MYOGENESIS                      | 197 | case     | 1.39  | 0.080993 | case     | 1.21  | 0.276254 | SVIL,SPTAN1,FHL1,TAGLN,PC                               |
| NOTCH_SIGNALING                 | 28  | case     | 0.91  | 0.762965 | controls | -0.77 | 0.923318 | PPARD                                                   |
| OXIDATIVE_PHOSPHORYLATION       | 194 | case     | 1.82  | 0.004724 | case     | 1.45  | 0.059126 | MDH2,ACADVL,ATP6V1D,PHB2,NDUFB3,OPA1,NDUFB6,NQO2,NDUFV1 |
| P53_PATHWAY                     | 195 | controls | -1.61 | 0.01035  | controls | -1.47 | 0.028355 | CASP1,DNTTIP2,TP53                                      |
| PEROXISOME                      | 96  | case     | 1.18  | 0.309822 | case     | 0.99  | 0.658104 | PRDX5,VPS4B,ATXN1                                       |
| PI3K_AKT_MTOR_SIGNALING         | 100 | controls | -1.79 | 0.001342 | controls | -1.68 | 0.004535 | CFL1,ECSIT,PIKFYVE,MAP3K7                               |
| PROTEIN_SECRETION               | 95  | controls | -1.28 | 0.096338 | controls | -1.39 | 0.04544  | PPT1,SNX2,ARFGAP3,VPS4B                                 |
| REACTIVE_OXYGEN_SPECIES_PATHWAY | 44  | controls | -1.63 | 0.008859 | controls | -1.63 | 0.007414 | PDLIM1                                                  |
| SPERMATOGENESIS                 | 124 | case     | 0.84  | 0.81949  | case     | 0.72  | 1        | PEBP1,ZC3H14                                            |
| TGF_BETA_SIGNALING              | 51  | controls | -1.59 | 0.011077 | controls | -1.68 | 0.005039 | APC,MAP3K7                                              |
| TNFA_SIGNALING_VIA_NFKB         | 195 | controls | -2.50 | 0        | controls | -2.26 | 0        | NFKB2,TRIP10,SGK1,FOSL2,KLF6,PHLDA1,IFIH1               |
| UNFOLDED_PROTEIN_RESPONSE       | 108 | controls | -2.20 | 0        | controls | -2.28 | 0        | PARN,BAG3,FUS,EIF4A3,DCP2,KHSRP,ASNS                    |
| UV_RESPONSE_DN                  | 140 | case     | 1.09  | 0.409433 | case     | 1.11  | 0.41775  | SIPA1L1,RND3,PHF3,ATXN1                                 |
| UV_RESPONSE_UP                  | 155 | controls | -1.98 | 0        | controls | -1.96 | 0        | TST,CASP3,PPT1,BID,UROD,ASNS,EIF5,CDC5L                 |
| WNT_BETA_CATENIN_SIGNALING      | 37  | controls | -0.87 | 0.783655 | controls | -0.88 | 0.759333 | TP53,PPARD                                              |
| XENOBIOTIC_METABOLISM           | 187 | controls | -1.41 | 0.035226 | controls | -1.47 | 0.028478 | HPRT1,PC,PPARD                                          |
| APICAL_SURFACE                  | 34  | controls | -0.94 | 0.655474 | controls | -1.00 | 0.471533 |                                                         |
| HEDGEHOG_SIGNALING              | 36  | case     | 1.03  | 0.541695 | case     | 0.96  | 0.646984 |                                                         |
| PANCREAS_BETA_CELLS             | 40  | controls | -0.53 | 0.998829 | case     | 0.57  | 0.998143 |                                                         |

**Table 2 15 HALLMARK gene sets with at least 3 BAG3-interacted proteins**

| Gene set                                  | Note                                                                                                                       | BAG3-interacted Proteins                                                     |
|-------------------------------------------|----------------------------------------------------------------------------------------------------------------------------|------------------------------------------------------------------------------|
| <b>Down-regulated in cardiomyopathies</b> |                                                                                                                            |                                                                              |
| MYC_TARGETS_V1                            | Signal DNA damage-induced apoptosis <sup>37</sup>                                                                          | HPRT1,PGK1,HNRNPC,EEF1B2,GL O1,C1QBP,PWP1,SF3A1,SERBP1,MR PL9,HDGF,CBX3,PHB2 |
| E2F_TARGETS                               | Integrate cell cycle progression with DNA repair, replication, and G2/M checkpoints <sup>34</sup>                          | RFC2,RFC3,PSIP1,CBX5,NUP153,PN N,TMPO,STMN1,NASP,RACGAP1, TP53               |
| G2M_CHECKPOINT                            | Prevent DNA damaged cells from entering mitosis <sup>39</sup>                                                              | NCL,SFPQ,TMPO,STMN1,NASP,TO P1,KIF23,TPX2,RACGAP1                            |
| P53_PATHWAY                               | Promote cell cycle arrest to allow DNA repair or apoptosis <sup>38</sup>                                                   | CASP1,DNTTIP2,TP53                                                           |
| APOPTOSIS                                 | Cardiomyocyte apoptosis-interruptus <sup>48</sup>                                                                          | LMNA,ANXA1,CASP1,CASP4,CAS P3,PPT1,BID,BNIP3L,SPTAN1                         |
| HYPOXIA                                   | Alter myocardial gene expression and induce cardiomyocyte apoptosis <sup>52</sup>                                          | NAGK,BNIP3L,PRDX5,MIF,PGK1,F OSL2,KLF6                                       |
| XENOBIOTIC_METABOLISM                     | Oxidative stress with excessive production of reactive oxygen species (ROS) <sup>55</sup>                                  | HPRT1,PC,PPARD                                                               |
| UV_RESPONSE_UP                            | DNA damage repair <sup>53</sup>                                                                                            | TST,CASP3,PPT1,BID,UROD,ASNS, EIF5,CDC5L                                     |
| UNFOLDED_PROTEIN_RESPONSE                 | Decrease global protein synthesis, and increase refolding or degradation of misfolded proteins <sup>56</sup>               | PARN,BAG3,FUS,EIF4A3,DCP2,KH SRP,ASNS                                        |
| TNFA_SIGNALING_VIA_NFKB                   | Cardioprotective in hypoxic or ischemic myocardial injury <sup>64</sup>                                                    | NFKB2,TRIP10,SGK1,FOSL2,KLF6,P HLDA1,IFIH1                                   |
| MTORC1_SIGNALING                          | Regulate cell growth and metabolism <sup>66</sup> and mediate adaptive cardiac hypertrophy <sup>67</sup>                   | HPRT1,PGK1,PSMC2,ATP6V1D,AS NS                                               |
| ESTROGEN_RESPONSE_LATE                    | Prevent apoptosis and necrosis of cardiac and endothelial cells <sup>69</sup>                                              | TST,HPRT1,DHRS2,SGK1                                                         |
| PI3K_AKT_MTOR_SIGNALING                   | Lead to cell proliferation <sup>70</sup> and inhibit cardiomyocyte apoptosis <sup>71</sup>                                 | CFL1,ECSIT,PIKFYVE,MAP3K7                                                    |
| IL2_STAT5_SIGNALING                       | Modulate CD4+ Th cell differentiation <sup>72</sup> and upregulate the expression of c-Myc, BCL-2, and BCL-x <sup>73</sup> | CASP3,KLF6,PHLDA1                                                            |
| <b>Up-regulated in cardiomyopathies</b>   |                                                                                                                            |                                                                              |

|                           |                                                                                                                                                   |                                      |
|---------------------------|---------------------------------------------------------------------------------------------------------------------------------------------------|--------------------------------------|
| INTERFERON_ALPHA_RESPONSE | Interferon inhibits cardiac cell function <i>in vitro</i> <sup>74</sup> and interferon treatment has been shown of cardiotoxicity <sup>75</sup> . | CASP1,IRF9,TRIM21,IFI44,SP110,IFI H1 |
|---------------------------|---------------------------------------------------------------------------------------------------------------------------------------------------|--------------------------------------|

## References

1. Fagerberg L, Hallström BM, Oksvold P, et al. Analysis of the human tissue-specific expression by genome-wide integration of transcriptomics and antibody-based proteomics. *Molecular & cellular proteomics : MCP*. Feb 2014;13(2):397-406. doi:10.1074/mcp.M113.035600
2. Luthold C, Lambert H, Guilbert SM, et al. CDK1-Mediated Phosphorylation of BAG3 Promotes Mitotic Cell Shape Remodeling and the Molecular Assembly of Mitotic p62 Bodies. *Cells*. 2021;10(10):2638. doi:10.3390/cells10102638
3. Quintana MT, Parry TL, He J, et al. Cardiomyocyte-specific human Bcl2-associated anthanogene 3 P209L expression induces mitochondrial fragmentation, Bcl2-associated anthanogene 3 haploinsufficiency, and activates p38 signaling. *The American journal of pathology*. 2016;186(8):1989-2007.
4. Martin TG, Myers VD, Dubey P, et al. Cardiomyocyte contractile impairment in heart failure results from reduced BAG3-mediated sarcomeric protein turnover. *Nature communications*. 2021;12(1):1-16.
5. Stürner E, Behl C. The Role of the Multifunctional BAG3 Protein in Cellular Protein Quality Control and in Disease. *Frontiers in molecular neuroscience*. 2017;10:177. doi:10.3389/fnmol.2017.00177
6. Arimura T, Ishikawa T, Nunoda S, Kawai S, Kimura A. Dilated cardiomyopathy-associated BAG3 mutations impair Z-disc assembly and enhance sensitivity to apoptosis in cardiomyocytes. *Human mutation*. 2011;32(12):1481-1491.
7. van Spaendonck-Zwarts KY, Posafalvi A, van den Berg MP, et al. Titin gene mutations are common in families with both peripartum cardiomyopathy and dilated cardiomyopathy. *European heart journal*. 2014;35(32):2165-2173.
8. Arimura T, Ishikawa T, Nunoda S, Kawai S, Kimura A. Dilated cardiomyopathy-associated BAG3 mutations impair Z-disc assembly and enhance sensitivity to apoptosis in cardiomyocytes. *Human mutation*. Dec 2011;32(12):1481-91. doi:10.1002/humu.21603
9. Antoku K, Maser RS, Scully WJ, Delach SM, Johnson DE. Isolation of Bcl-2 Binding Proteins That Exhibit Homology with BAG-1 and Suppressor of Death Domains Protein. *Biochemical and Biophysical Research Communications*. 2001/09/07/ 2001;286(5):1003-1010. doi:<https://doi.org/10.1006/bbrc.2001.5512>
10. Macias MJ, Wiesner S, Sudol M. WW and SH3 domains, two different scaffolds to recognize proline-rich ligands. *FEBS Lett*. Feb 20 2002;513(1):30-7. doi:10.1016/s0014-5793(01)03290-2
11. Iwasaki M, Tanaka R, Hishiya A, Homma S, Reed JC, Takayama S. BAG3 directly associates with guanine nucleotide exchange factor of Rap1, PDZGEF2, and regulates cell adhesion. *Biochemical and biophysical research communications*. 2010;400(3):413-418.
12. Fuchs M, Poirier DJ, Seguin SJ, et al. Identification of the key structural motifs involved in HspB8/HspB6–Bag3 interaction. *Biochemical Journal*. 2010;425(1):245-257.
13. Doong H, Price J, Kim YS, et al. CAIR-1/BAG-3 forms an EGF-regulated ternary complex with phospholipase C-γ and Hsp70/Hsc70. *Oncogene*. 2000;19(38):4385-4395.
14. McCollum AK, Casagrande G, Kohn EC. Caught in the middle: the role of Bag3 in disease. *Biochemical Journal*. 2010;425(1):e1-e3.
15. Villard E, Perret C, Gary F, et al. A genome-wide association study identifies two loci associated with heart failure due to dilated cardiomyopathy. *European heart journal*. 2011;32(9):1065-1076.
16. Tadros R, Francis C, Xu X, et al. Shared genetic pathways contribute to risk of hypertrophic and dilated cardiomyopathies with opposite directions of effect. *Nature genetics*. Feb 2021;53(2):128-134. doi:10.1038/s41588-020-00762-2

17. Smeland OB, Shadrin A, Bahrami S, et al. Genome-wide Association Analysis of Parkinson's Disease and Schizophrenia Reveals Shared Genetic Architecture and Identifies Novel Risk Loci. *Biological psychiatry*. Feb 1 2021;89(3):227-235. doi:10.1016/j.biopsych.2020.01.026
18. Nalls MA, Blauwendraat C, Vallerga CL, et al. Identification of novel risk loci, causal insights, and heritable risk for Parkinson's disease: a meta-analysis of genome-wide association studies. *The Lancet Neurology*. Dec 2019;18(12):1091-1102. doi:10.1016/s1474-4422(19)30320-5
19. Roux KJ, Kim DI, Burke B, May DG. BioID: A Screen for Protein-Protein Interactions. *Current protocols in protein science*. Feb 21 2018;91:19.23.1-19.23.15. doi:10.1002/cpps.51
20. Hannenhalli S, Putt ME, Gilmore JM, et al. Transcriptional genomics associates FOX transcription factors with human heart failure. *Circulation*. Sep 19 2006;114(12):1269-76. doi:10.1161/circulationaha.106.632430
21. Subramanian A, Tamayo P, Mootha VK, et al. Gene set enrichment analysis: A knowledge-based approach for interpreting genome-wide expression profiles. *Proceedings of the National Academy of Sciences*. 2005;102(43):15545-15550. doi:doi:10.1073/pnas.0506580102
22. Liberzon A, Birger C, Thorvaldsdóttir H, Ghandi M, Mesirov JP, Tamayo P. The Molecular Signatures Database (MSigDB) hallmark gene set collection. *Cell systems*. Dec 23 2015;1(6):417-425. doi:10.1016/j.cels.2015.12.004
23. Myers VD, Gerhard GS, McNamara DM, et al. Association of Variants in BAG3 With Cardiomyopathy Outcomes in African American Individuals. *JAMA cardiology*. Oct 1 2018;3(10):929-938. doi:10.1001/jamacardio.2018.2541
24. Tomar D, Thomas M, Garbincius JF, et al. MICU1 regulates mitochondrial cristae structure and function independent of the mitochondrial calcium uniporter channel. *BioRxiv*. 2019:803213.
25. Choi M, Chang C-Y, Clough T, et al. MSstats: an R package for statistical analysis of quantitative mass spectrometry-based proteomic experiments. *Bioinformatics (Oxford, England)*. 2014;30(17):2524-2526.
26. Wisniewska M, Karlberg T, Lehtiö L, et al. Crystal structures of the ATPase domains of four human Hsp70 isoforms: HSPA1L/Hsp70-hom, HSPA2/Hsp70-2, HSPA6/Hsp70B', and HSPA5/BiP/GRP78. *PloS one*. 2010;5(1):e8625.
27. Shomura Y, Dragovic Z, Chang H-C, et al. Regulation of Hsp70 function by HspBP1: structural analysis reveals an alternate mechanism for Hsp70 nucleotide exchange. *Molecular cell*. 2005;17(3):367-379.
28. Kasof GM, Goyal L, White E. Btf, a novel death-promoting transcriptional repressor that interacts with Bcl-2-related proteins. *Molecular and cellular biology*. 1999;19(6):4390-4404.
29. Zhang Y, Zhang X, Cai B, et al. The long noncoding RNA IncCIRBIL disrupts the nuclear translocation of Bclaf1 alleviating cardiac ischemia–reperfusion injury. *Nature communications*. 2021;12(1):522.
30. Chen Y, Lewis W, Diwan A, Cheng EH-Y, Matkovich SJ, Dorn GW. Dual autonomous mitochondrial cell death pathways are activated by Nix/BNip3L and induce cardiomyopathy. *Proceedings of the National Academy of Sciences*. 2010;107(20):9035-9042.
31. Chen Y, Yang L-N, Cheng L, et al. Bcl2-associated athanogene 3 interactome analysis reveals a new role in modulating proteasome activity. *Molecular & Cellular Proteomics*. 2013;12(10):2804-2819.
32. Zhao M-T, Ye S, Su J, Garg V. Cardiomyocyte proliferation and maturation: two sides of the same coin for heart regeneration. *Frontiers in Cell and Developmental Biology*. 2020;8:594226.
33. Naqvi N, Li M, Calvert JW, et al. A proliferative burst during preadolescence establishes the final cardiomyocyte number. *Cell*. 2014;157(4):795-807.
34. Zebrowski DC, Engel FB. The cardiomyocyte cell cycle in hypertrophy, tissue homeostasis, and regeneration. *Reviews of Physiology, Biochemistry and Pharmacology, Vol 165*. 2013:67-96.



35. Patel JH, Loboda AP, Showe MK, Showe LC, McMahon SB. Analysis of genomic targets reveals complex functions of MYC. *Nature Reviews Cancer*. 2004;4(7):562-568.
36. García-Gutiérrez L, Delgado MD, León J. MYC Oncogene Contributions to Release of Cell Cycle Brakes. *Genes*. Mar 22 2019;10(3)doi:10.3390/genes10030244
37. Pheesse T, Myant K, Cole A, et al. Endogenous c-Myc is essential for p53-induced apoptosis in response to DNA damage in vivo. *Cell Death & Differentiation*. 2014;21(6):956-966.
38. Ozaki T, Nakagawara A. Role of p53 in Cell Death and Human Cancers. *Cancers*. Mar 3 2011;3(1):994-1013. doi:10.3390/cancers3010994
39. Stark GR, Taylor WR. Analyzing the G2/M checkpoint. *Methods in molecular biology (Clifton, NJ)*. 2004;280:51-82. doi:10.1385/1-59259-788-2:051
40. Spiegel R, Gomez EA, Akman HO, Krishna S, Horovitz Y, DiMauro S. Myopathic form of phosphoglycerate kinase (PGK) deficiency: a new case and pathogenic considerations. *Neuromuscular disorders : NMD*. Mar 2009;19(3):207-11. doi:10.1016/j.nmd.2008.12.004
41. Singer-Sam J, Simmer RL, Keith DH, et al. Isolation of a cDNA clone for human X-linked 3-phosphoglycerate kinase by use of a mixture of synthetic oligodeoxyribonucleotides as a detection probe. *Proc Natl Acad Sci U S A*. Feb 1983;80(3):802-6. doi:10.1073/pnas.80.3.802
42. Feichtinger RG, Oláhová M, Kishita Y, et al. Biallelic C1QBP Mutations Cause Severe Neonatal-, Childhood-, or Later-Onset Cardiomyopathy Associated with Combined Respiratory-Chain Deficiencies. *Am J Hum Genet*. Oct 5 2017;101(4):525-538. doi:10.1016/j.ajhg.2017.08.015
43. Ghosh A, Trivedi PP, Timbalia SA, et al. Copper supplementation restores cytochrome c oxidase assembly defect in a mitochondrial disease model of COA6 deficiency. *Hum Mol Genet*. Jul 1 2014;23(13):3596-606. doi:10.1093/hmg/ddu069
44. Hoffman Jr JW, Gilbert TB, Poston RS, Silldorff EP. Myocardial reperfusion injury: etiology, mechanisms, and therapies. *J extra corpor Technol*. 2004;36(4):391-411.
45. Eefting F, Rensing B, Wigman J, et al. Role of apoptosis in reperfusion injury. *Cardiovascular research*. 2004;61(3):414-426.
46. Takemura G, Kanoh M, Minatoguchi S, Fujiwara H. Cardiomyocyte apoptosis in the failing heart—a critical review from definition and classification of cell death. *International journal of cardiology*. 2013;167(6):2373-2386.
47. González A, Fortuño MaA, Querejeta R, et al. Cardiomyocyte apoptosis in hypertensive cardiomyopathy. *Cardiovascular research*. 2003;59(3):549-562.
48. Narula J, Kolodgie FD, Virmani R. Apoptosis and cardiomyopathy. *Current opinion in cardiology*. 2000;15(3):183-188.
49. Feldman AM, Gordon J, Wang J, et al. Novel BAG3 variants in African American patients with cardiomyopathy: reduced  $\beta$ -adrenergic responsiveness in excitation–contraction. *Journal of cardiac failure*. 2020;26(12):1075-1085.
50. Giordano FJ. Oxygen, oxidative stress, hypoxia, and heart failure. *The Journal of clinical investigation*. 2005;115(3):500-508.
51. Tintu A, Rouwet E, Verlohren S, et al. Hypoxia induces dilated cardiomyopathy in the chick embryo: mechanism, intervention, and long-term consequences. *PLoS one*. 2009;4(4):e5155.
52. Zhang J, He Z, Xiao W, et al. Overexpression of BAG3 attenuates hypoxia-induced cardiomyocyte apoptosis by inducing autophagy. *Cellular Physiology and Biochemistry*. 2016;39(2):491-500.
53. Tsutsui H, Ide T, Kinugawa S. Mitochondrial oxidative stress, DNA damage, and heart failure. *Antioxidants & redox signaling*. 2006;8(9-10):1737-1744.
54. Giglia-Mari G, Zotter A, Vermeulen W. DNA damage response. *Cold Spring Harbor perspectives in biology*. 2011;3(1):a000745.

55. Costa VM, Carvalho F, Duarte JA, Bastos MdL, Remião F. The heart as a target for xenobiotic toxicity: the cardiac susceptibility to oxidative stress. *Chemical research in toxicology*. 2013;26(9):1285-1311.
56. Cao SS, Kaufman RJ. Unfolded protein response. *Current biology*. 2012;22(16):R622-R626.
57. Mayer MP, Bukau B. Hsp70 chaperones: cellular functions and molecular mechanism. *Cell Mol Life Sci*. 2005;62(6):670-684. doi:10.1007/s00018-004-4464-6
58. Feizi A, Gatto F, Uhlen M, Nielsen J. Human protein secretory pathway genes are expressed in a tissue-specific pattern to match processing demands of the secretome. *npj Systems Biology and Applications*. 2017/08/18 2017;3(1):22. doi:10.1038/s41540-017-0021-4
59. Doroudgar S, Glembotski CC. The cardiokine story unfolds: ischemic stress-induced protein secretion in the heart. *Trends in molecular medicine*. 2011;17(4):207-214.
60. Ceconi C, Curello S, Bachetti T, Corti A, Ferrari R. Tumor necrosis factor in congestive heart failure: a mechanism of disease for the new millennium? *Progress in cardiovascular diseases*. 1998;41(1):25-30.
61. Zwaka TP, Manolov D, Özdemir C, et al. Complement and dilated cardiomyopathy: a role of sublytic terminal complement complex-induced tumor necrosis factor- $\alpha$  synthesis in cardiac myocytes. *The American journal of pathology*. 2002;161(2):449-457.
62. Schraufstatter IU, Khaldoyanidi SK, DiScipio RG. Complement activation in the context of stem cells and tissue repair. *World journal of stem cells*. 2015;7(8):1090.
63. Chakraborti T, Mandal A, Mandal M, Das S, Chakraborti S. Complement activation in heart diseases: Role of oxidants. *Cellular Signalling*. 2000/10/01/ 2000;12(9):607-617. doi:[https://doi.org/10.1016/S0898-6568\(00\)00111-X](https://doi.org/10.1016/S0898-6568(00)00111-X)
64. Dhingra R, Shaw JA, Aviv Y, Kirshenbaum LA. Dichotomous actions of NF- $\kappa$ B signaling pathways in heart. *Journal of cardiovascular translational research*. 2010;3:344-354.
65. Gordon JW, Shaw JA, Kirshenbaum LA. Multiple Facets of NF- $\kappa$ B in the Heart. *Circulation research*. 2011;108(9):1122-1132. doi:doi:10.1161/CIRCRESAHA.110.226928
66. Zou Z, Tao T, Li H, Zhu X. mTOR signaling pathway and mTOR inhibitors in cancer: progress and challenges. *Cell & Bioscience*. 2020/03/10 2020;10(1):31. doi:10.1186/s13578-020-00396-1
67. Sciarretta S, Forte M, Frati G, Sadoshima J. New Insights Into the Role of mTOR Signaling in the Cardiovascular System. *Circulation research*. 2018;122(3):489-505. doi:doi:10.1161/CIRCRESAHA.117.311147
68. Zhao J, Zhai B, Gygi SP, Goldberg AL. mTOR inhibition activates overall protein degradation by the ubiquitin proteasome system as well as by autophagy. *Proceedings of the National Academy of Sciences*. 2015;112(52):15790-15797.
69. Knowlton A, Lee A. Estrogen and the cardiovascular system. *Pharmacology & therapeutics*. 2012;135(1):54-70.
70. Paplomata E, O'Regan R. The PI3K/AKT/mTOR pathway in breast cancer: targets, trials and biomarkers. *Therapeutic advances in medical oncology*. Jul 2014;6(4):154-66. doi:10.1177/1758834014530023
71. Yao H, Han X, Han X. The cardioprotection of the insulin-mediated PI3K/Akt/mTOR signaling pathway. *American Journal of Cardiovascular Drugs*. 2014;14:433-442.
72. Jones DM, Read KA, Oestreich KJ. Dynamic Roles for IL-2–STAT5 Signaling in Effector and Regulatory CD4+ T Cell Populations. *The Journal of immunology*. 2020;205(7):1721-1730.
73. Lord JD, McIntosh BC, Greenberg PD, Nelson BH. The IL-2 receptor promotes lymphocyte proliferation and induction of the c-myc, bcl-2, and bcl-x genes through the trans-activation domain of Stat5. *The Journal of Immunology*. 2000;164(5):2533-2541.
74. Lampidis TJ, Brouty-Boyé D. Interferon inhibits cardiac cell function in vitro. *Proceedings of the Society for Experimental Biology and Medicine*. 1981;166(2):181-185.

75. Sonnenblick M, Rosin A. Cardiotoxicity of Interferon\*: A Review of 44 Cases. *Chest*. 1991/03/01/1991;99(3):557-561. doi:<https://doi.org/10.1378/chest.99.3.557>
76. Fosslien E. Mitochondrial medicine—cardiomyopathy caused by defective oxidative phosphorylation. *Annals of Clinical & Laboratory Science*. 2003;33(4):371-395.
77. Ludwig B, Bender E, Arnold S, Hüttemann M, Lee I, Kadenbach B. Cytochrome c oxidase and the regulation of oxidative phosphorylation. *ChemBiochem*. 2001;2(6):392-403.
78. Lal JC, Mao C, Zhou Y, et al. Transcriptomics-based network medicine approach identifies metformin as a repurposable drug for atrial fibrillation. *Cell reports Medicine*. Oct 18 2022;3(10):100749. doi:10.1016/j.xcrm.2022.100749
79. Lippi M, Stadiotti I, Pompilio G, Sommariva E. Human Cell Modeling for Cardiovascular Diseases. *International Journal of Molecular Sciences*. 2020;21(17):6388.

Up-regulated in cardiomyopathies:  
BILE\_ACID\_METABOLISM  
EPITHELIAL\_MESENCHYMAL\_TRANSITION

Down-regulated in cardiomyopathies:  
ANDROGEN\_RESPONSE  
ESTROGEN\_RESPONSE\_EARLY  
IL6\_JAK\_STAT3\_SIGNALING  
INFLAMMATORY\_RESPONSE  
MYC\_TARGETS\_V2  
REACTIVE\_OXYGEN\_SPECIES\_PATHWAY

medRxiv preprint doi: <https://doi.org/10.1101/2024.09.09.24313318>; this version posted September 10, 2024. The copyright holder for this preprint (which was not certified by peer review) is the author/funder, who has granted medRxiv a license to display the preprint in perpetuity. All rights reserved. No reuse allowed without permission.

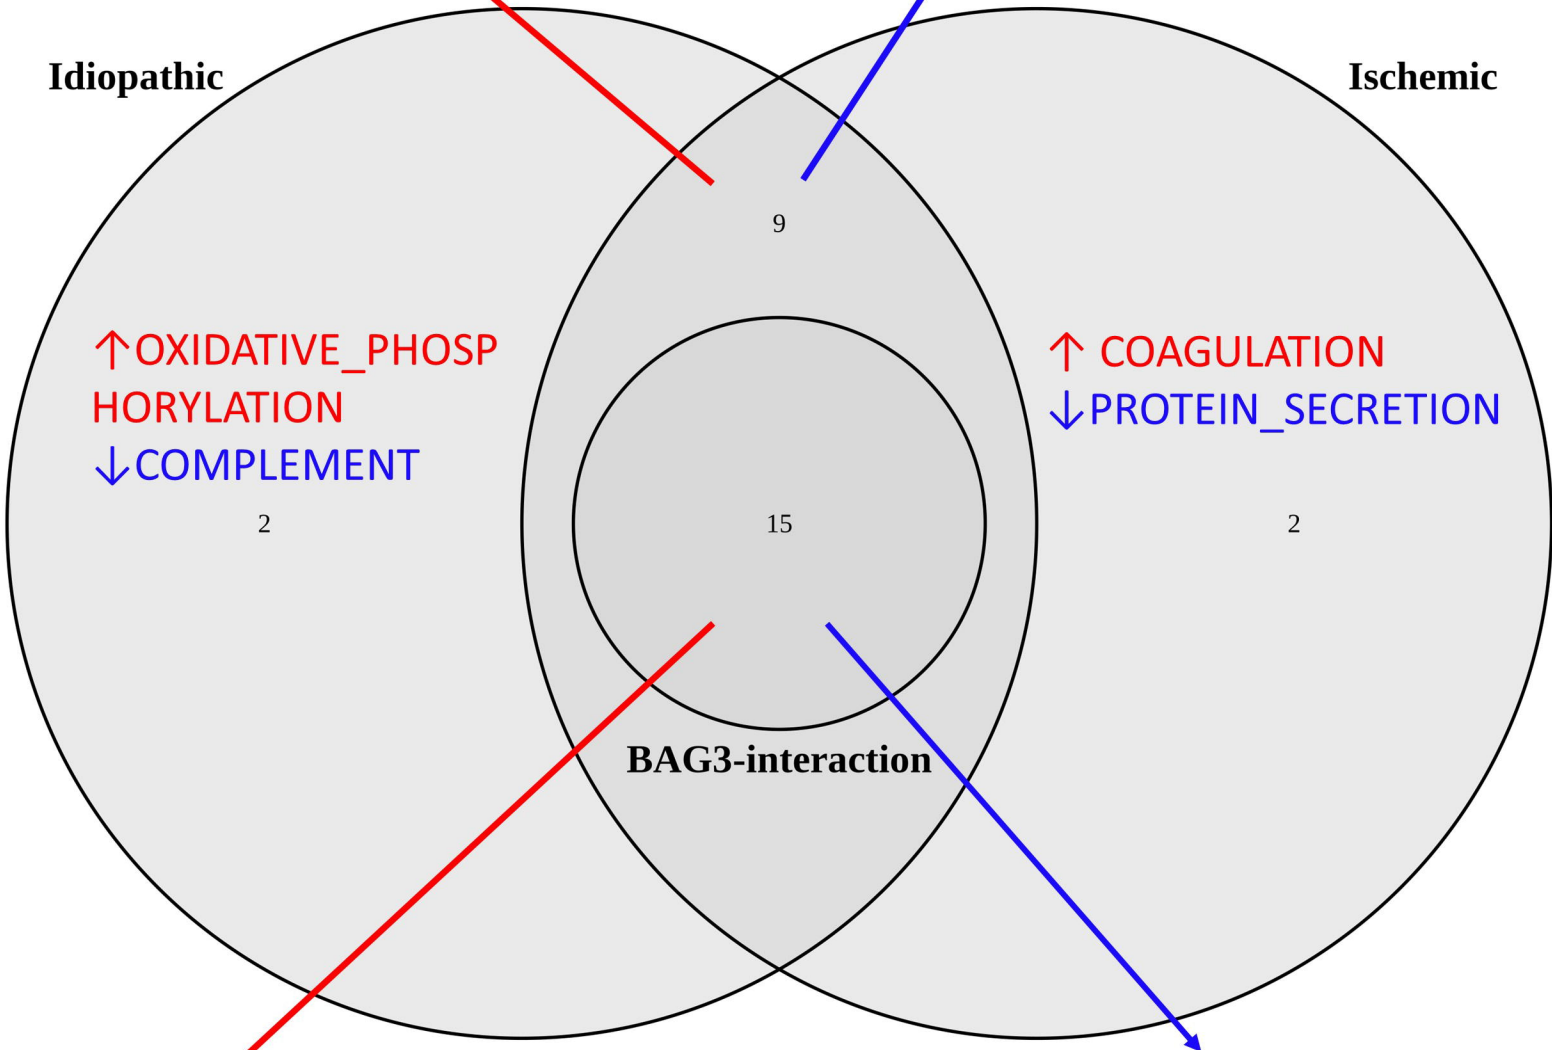

Up-regulated in cardiomyopathies:  
INTERFERON\_ALPHA\_RESPONSE

Down-regulated in cardiomyopathies:  
APOPTOSIS  
E2F\_TARGETS  
ESTROGEN\_RESPONSE\_LATE  
G2M\_CHECKPOINT  
HYPOXIA  
IL2\_STAT5\_SIGNALING  
MTORC1\_SIGNALING  
MYC\_TARGETS\_V1  
P53\_PATHWAY  
PI3K\_AKT\_MTOR\_SIGNALING  
TNFA\_SIGNALING\_VIA\_NFKB  
UNFOLDED\_PROTEIN\_RESPONSE  
UV\_RESPONSE\_UP  
XENOBIOTIC\_METABOLISM
